# Supplementary material
Source: publisher site journal article supplement (https://www.dovepress.com/article/389598)
Supplement: Supplementary file 1 [file get_supplementary_file.php]

**
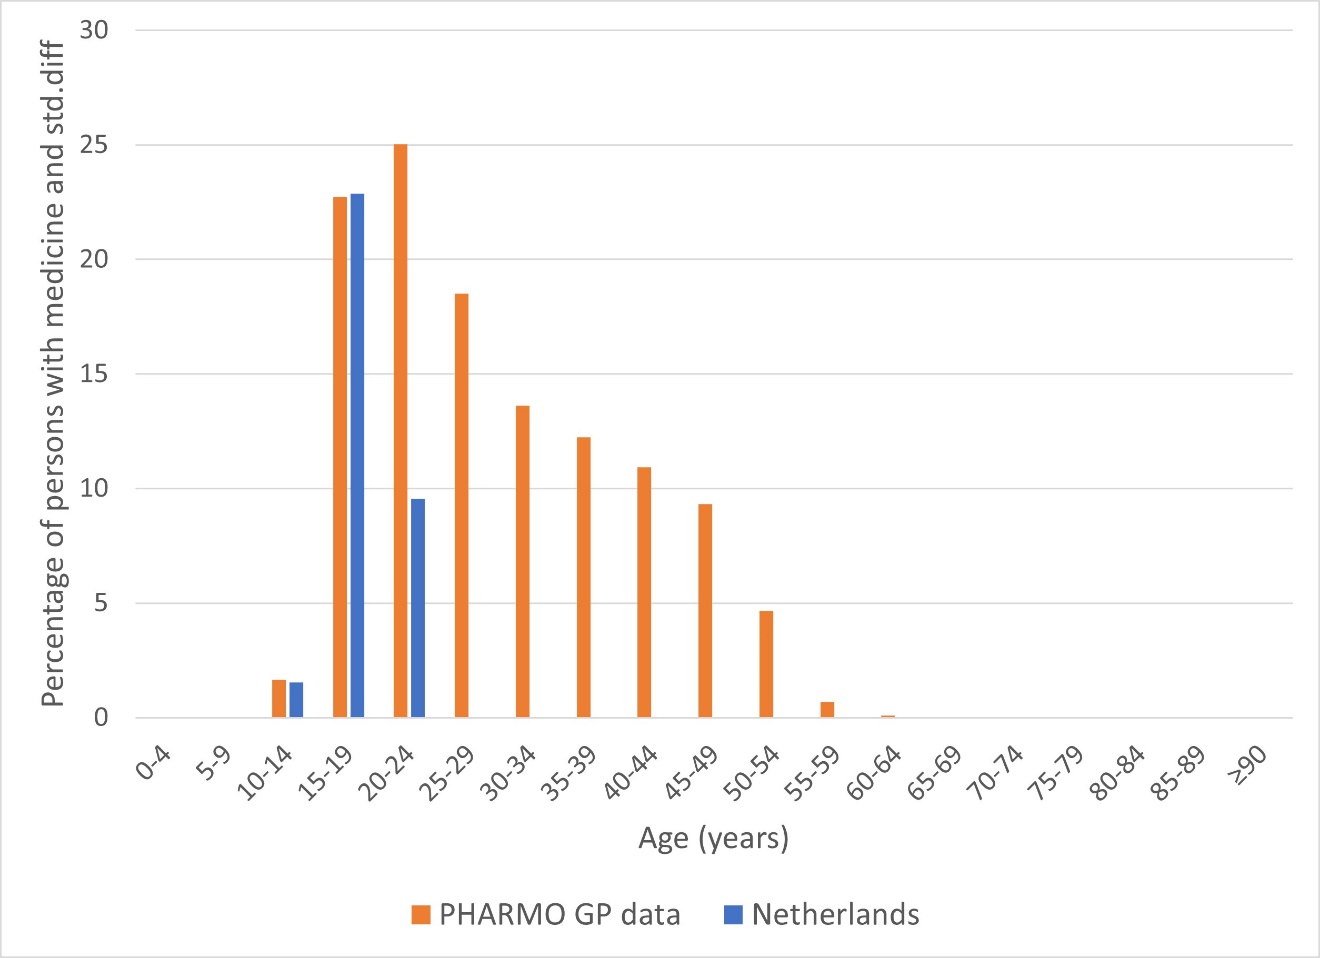
Figure S1** Hormonal contraceptives for systemic use by age in the PHARMO GP data and the Netherlands in 2018

**Table S1** Demographic characteristics of the population in PHARMO GP data, the Netherlands and Nivel at January 1st, 2006

|  | PHARMO GP data  N = 1,410,073 | The Netherlands  N = 16,334,210 | Nivel  N = n.a. | Std.diff | |
| --- | --- | --- | --- | --- | --- |
|  | % | % | % | GP vs NL | GP vs Nivel |
| Sex |  |  |  |  |  |
| males | 49.6 | 49.5 | n.a. | 0.00 | - |
| females | 50.4 | 50.5 | n.a. | 0.00 | - |
| unknown | <0.5 | 0.0 | n.a. | 0.01 | - |
| Age (years) |  |  |  |  |  |
| 0-4 | 5.1 | 6.0 | n.a. | -0.04 | - |
| 5-17 | 38.3 | 37.3 | n.a. | 0.02 | - |
| 18-44 | 26.9 | 26.5 | n.a. | 0.01 | - |
| 45-64 | 18.4 | 15.9 | n.a. | 0.07 | - |
| 65-74 | 6.9 | 7.8 | n.a. | -0.04 | - |
| 75-84 | 3.5 | 4.9 | n.a. | -0.07 | - |
| ≥85 | 1.0 | 1.5 | n.a. | -0.05 | - |
| unknown | <0.5 | 0.0 | n.a. | 0.02 | - |
| Degree of urbanization |  |  |  |  |  |
| extremely urbanized | 21.8 | 19.2 | n.a. | 0.06 | - |
| strongly urbanized | 26.4 | 22.9 | n.a. | 0.08 | - |
| moderately urbanized | 20.6 | 18 | n.a. | 0.07 | - |
| hardly urbanized | 20.3 | 19.5 | n.a. | 0.02 | - |
| not urbanized | 8 | 20.4 | n.a. | -0.36 | - |
| unknown | 2.9 | 0.0 | n.a. | 0.24 | - |
| Deceased | 0.18 | 0.83 | n.a. | -0.09 | - |

n.a. = not available. No information was available regarding demographic characteristics in Nivel in 2006.


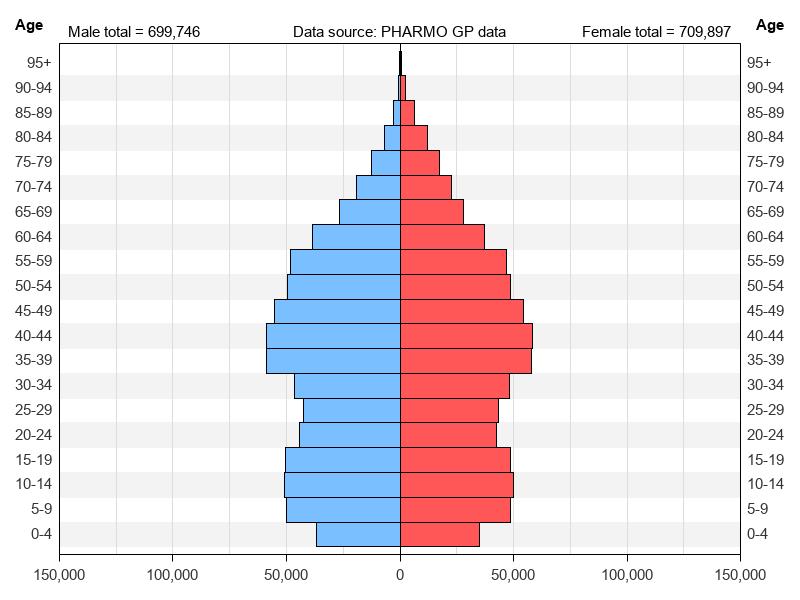
**
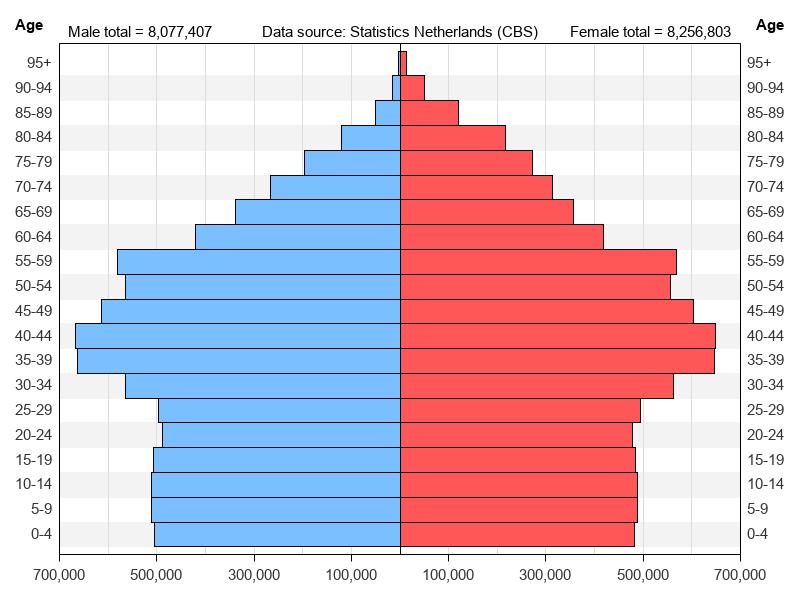
**

**Figure S2** Population pyramid of the PHARMO GP population and the Dutch population at January 1st, 2006.

**
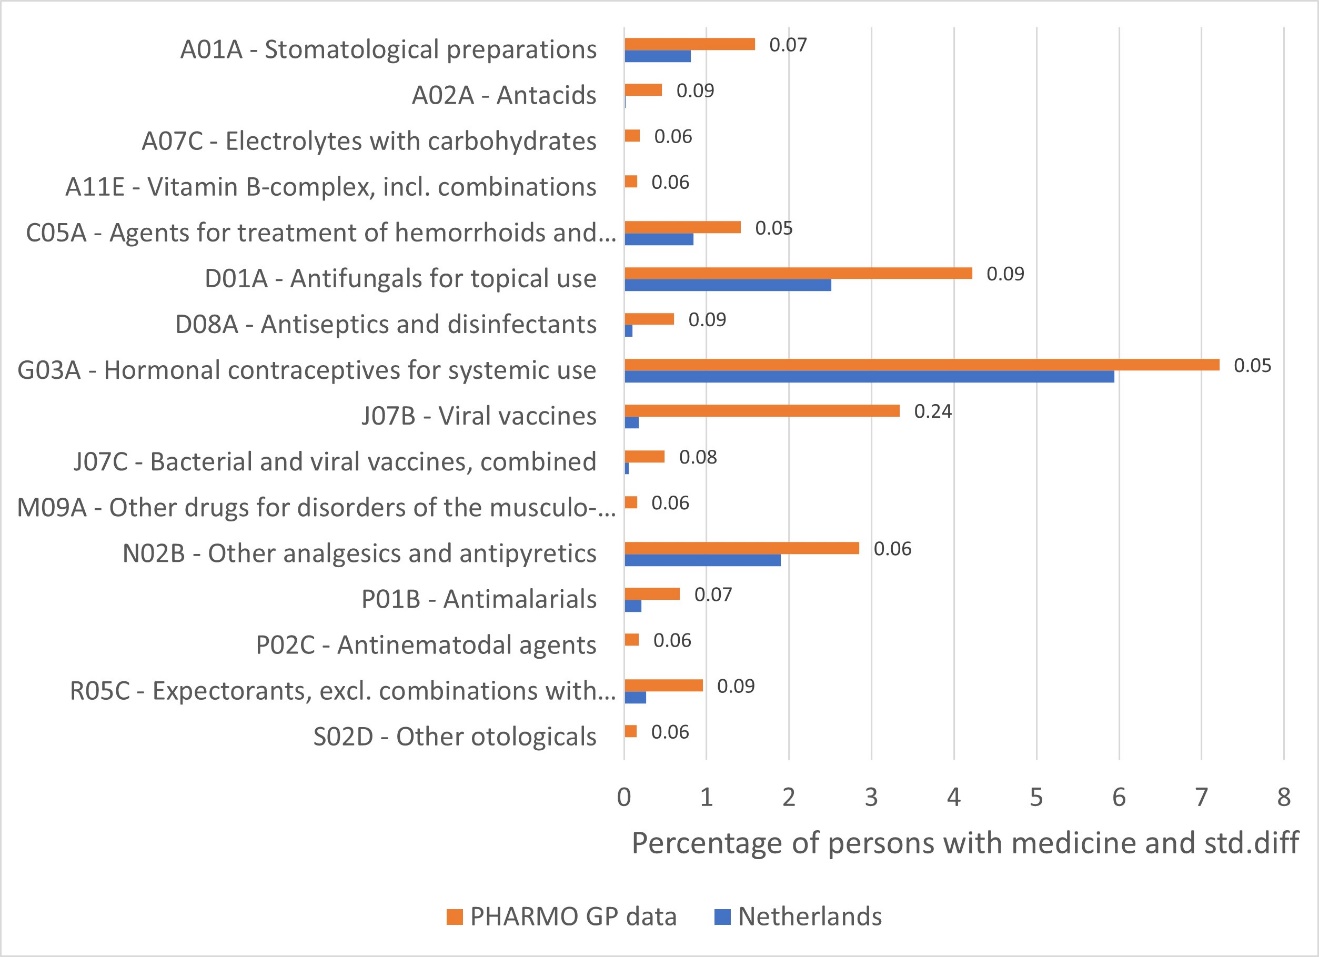
 Figure S3** Medication use per pharmacological subgroup (ATC 3rd level) in the PHARMO GP data and the Netherlands in 2006 with absolute std.diff ≥0.05.

**
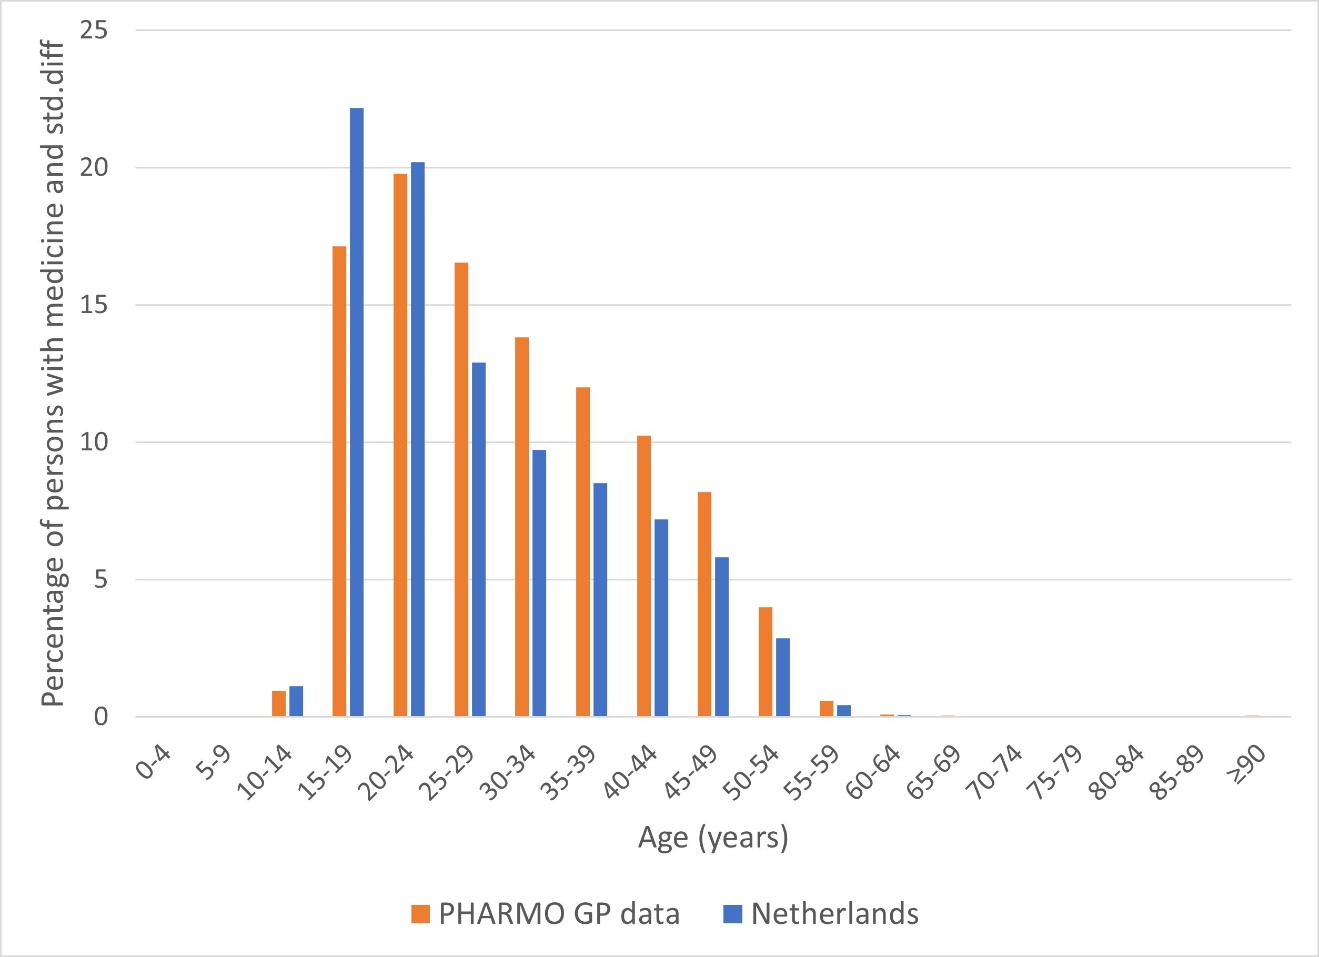
Figure S4** Hormonal contraceptives for systemic use by age in the PHARMO GP data and the Netherlands in 2006

**Table S2** Demographic characteristics of the population in PHARMO GP data, the Netherlands and Nivel at January 1st, 2012

|  | PHARMO GP data  N = 3,182,707 | The Netherlands  N = 16,730,348 | Nivel  N = 858,788 | Std.diff | |
| --- | --- | --- | --- | --- | --- |
|  | % | % | % | GP vs NL | GP vs Nivel |
| Sex |  |  |  |  |  |
| males | 49.7 | 49.5 | 49.5 | 0.00 | 0.00 |
| females | 50.3 | 50.5 | 50.5 | 0.00 | 0.00 |
| unknown | <0.5 | 0.0 | 0.0 | 0.01 | 0.01 |
| Age (years) |  |  |  |  |  |
| 0-4 | 4.4 | 5.5 | 5.1 | -0.05 | -0.03 |
| 5-17 | 16.4 | 15.3 | 15.5 | 0.03 | 0.02 |
| 18-44 | 36.2 | 34.9 | 34.4 | 0.03 | 0.04 |
| 45-64 | 27.9 | 28.0 | 28.0 | 0.00 | 0.00 |
| 65-74 | 9.0 | 9.1 | 10.0 | 0.00 | -0.03 |
| 75-84 | 4.6 | 5.2 | 5.5 | -0.03 | -0.04 |
| ≥85 | 1.5 | 1.9 | 2.3 | -0.03 | -0.06 |
| unknown | <0.5 | 0.0 | 0.0 | 0.01 | 0.01 |
| Degree of urbanization |  |  |  |  |  |
| extremely urbanized | 24.3 | 20.5 | n.a. | 0.09 | - |
| strongly urbanized | 23.6 | 24 | n.a. | -0.01 | - |
| moderately urbanized | 18.9 | 18.1 | n.a. | 0.02 | - |
| hardly urbanized | 20.7 | 18.6 | n.a. | 0.05 | - |
| not urbanized | 10.0 | 18.8 | n.a. | -0.25 | - |
| unknown | 2.5 | 0.0 | n.a. | 0.22 | - |
| Deceased | 0.28 | 0.84 | n.a. | -0.07 | - |

**
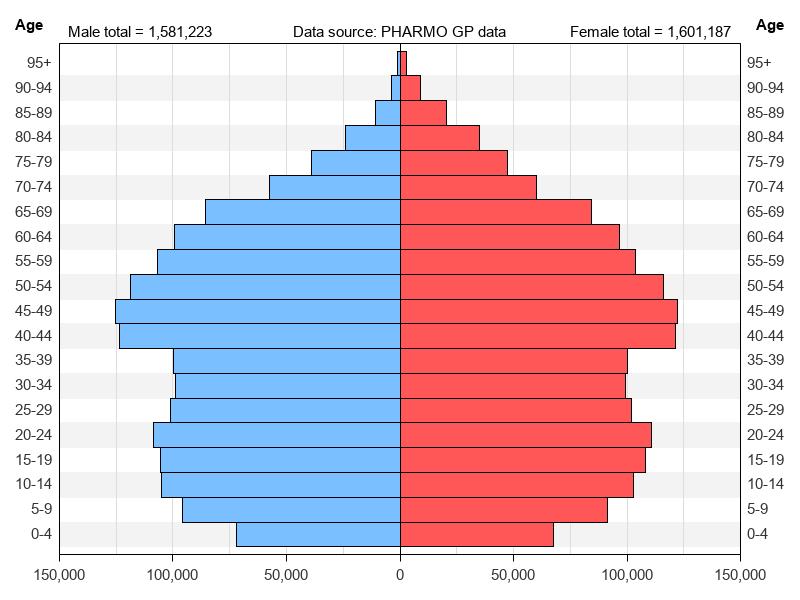

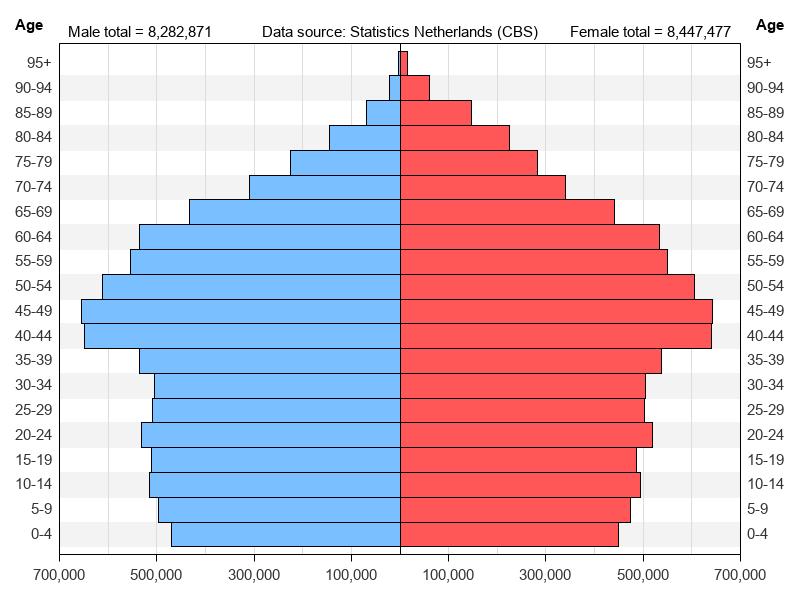
**

**Figure S5** Population pyramid of the PHARMO GP population and the Dutch population at January 1st, 2012.

**
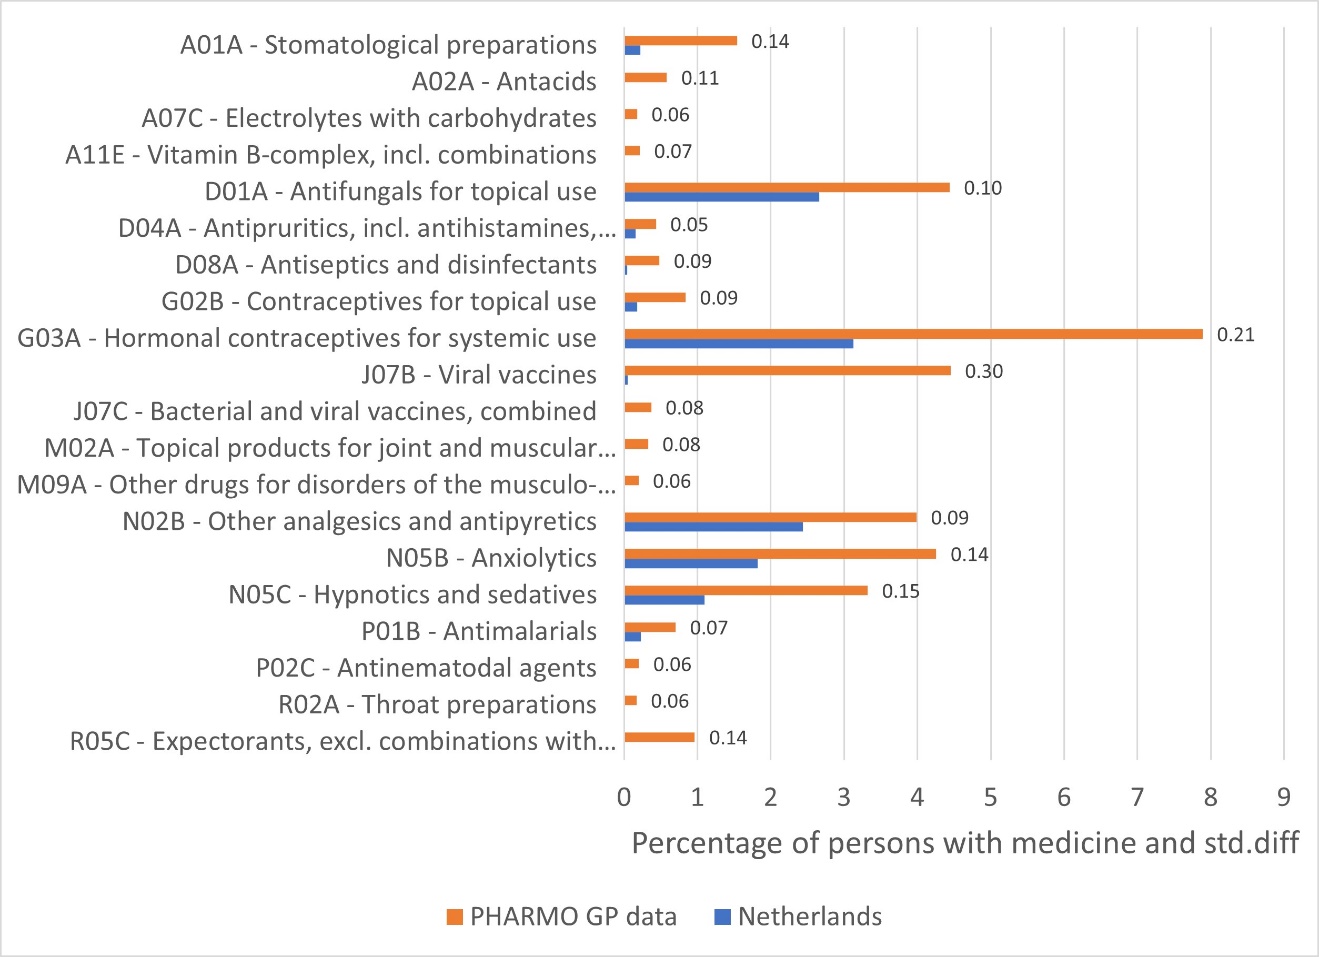
**

**Figure S6** Medication use per pharmacological subgroup (ATC 3rd level) in the PHARMO GP data and the Netherlands in 2012 with absolute std.diff ≥0.05.

**
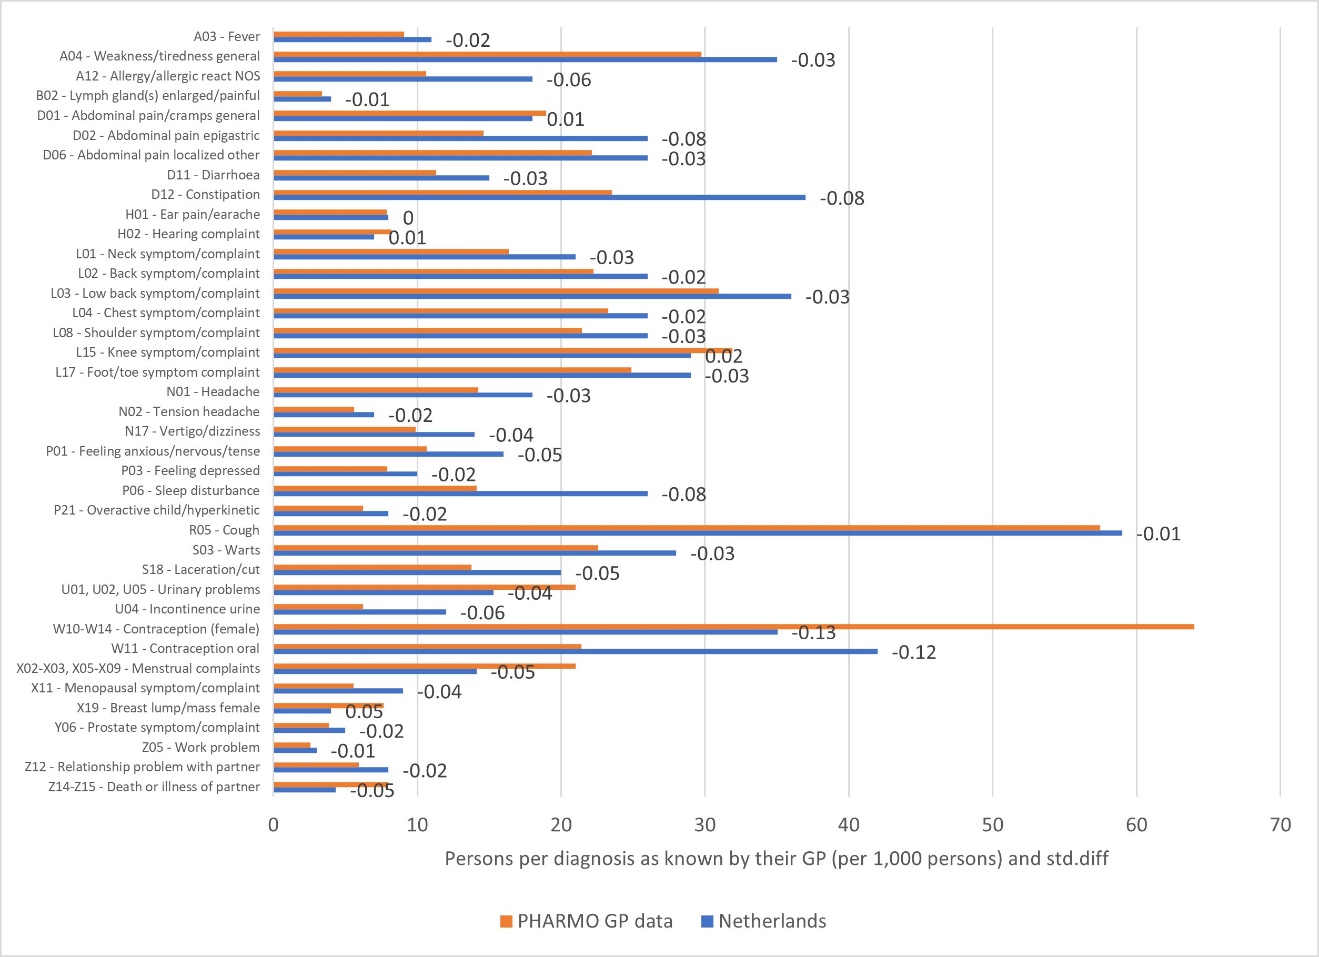

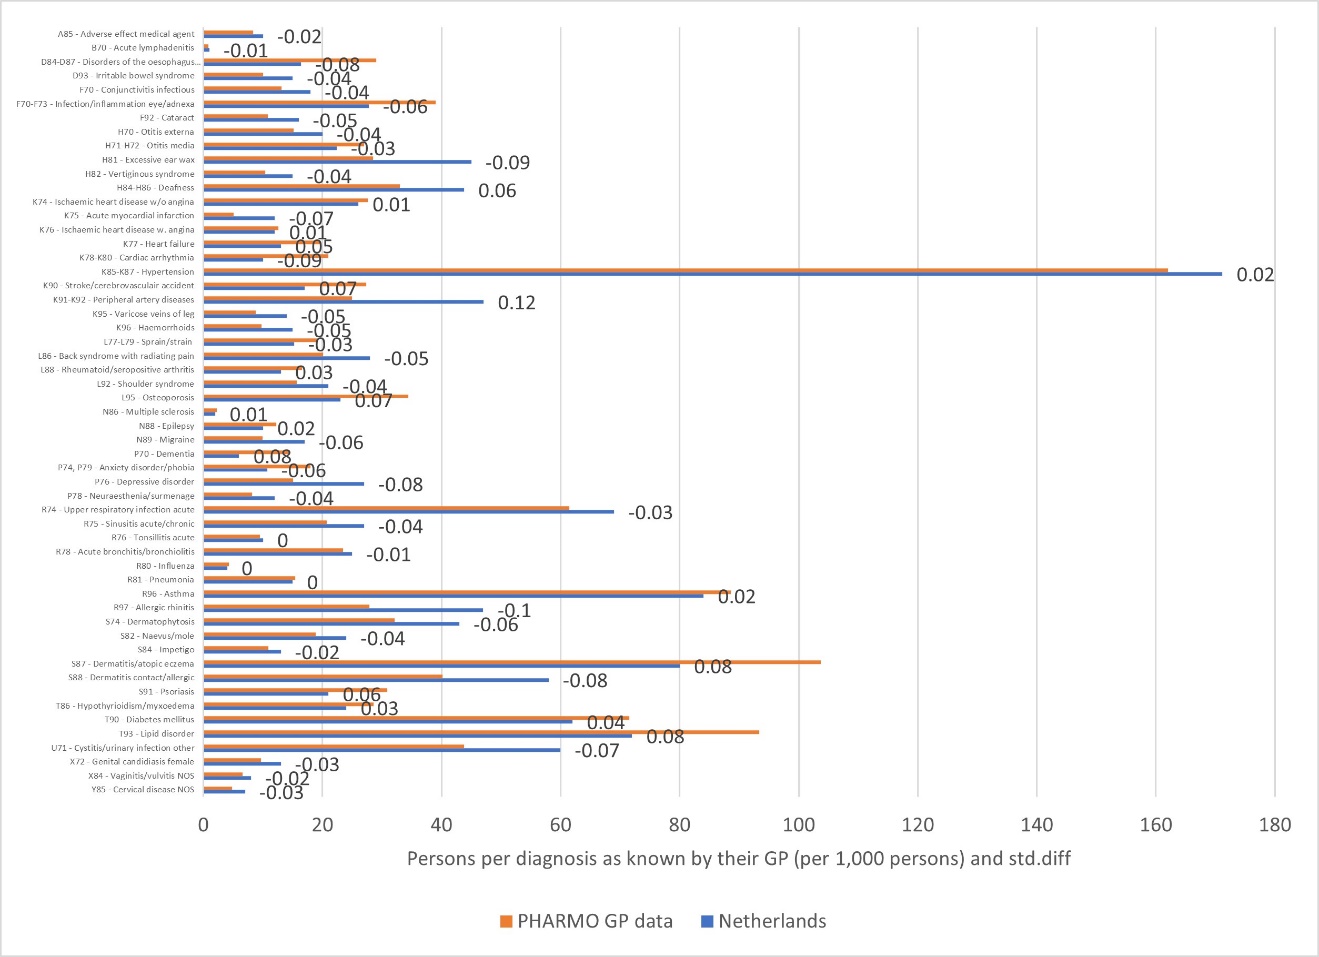
Figure S7** Symptoms and complaints (a) and diagnoses (b) per ICPC level in the PHARMO GP data and the Netherlands in 2012.

b)

a)


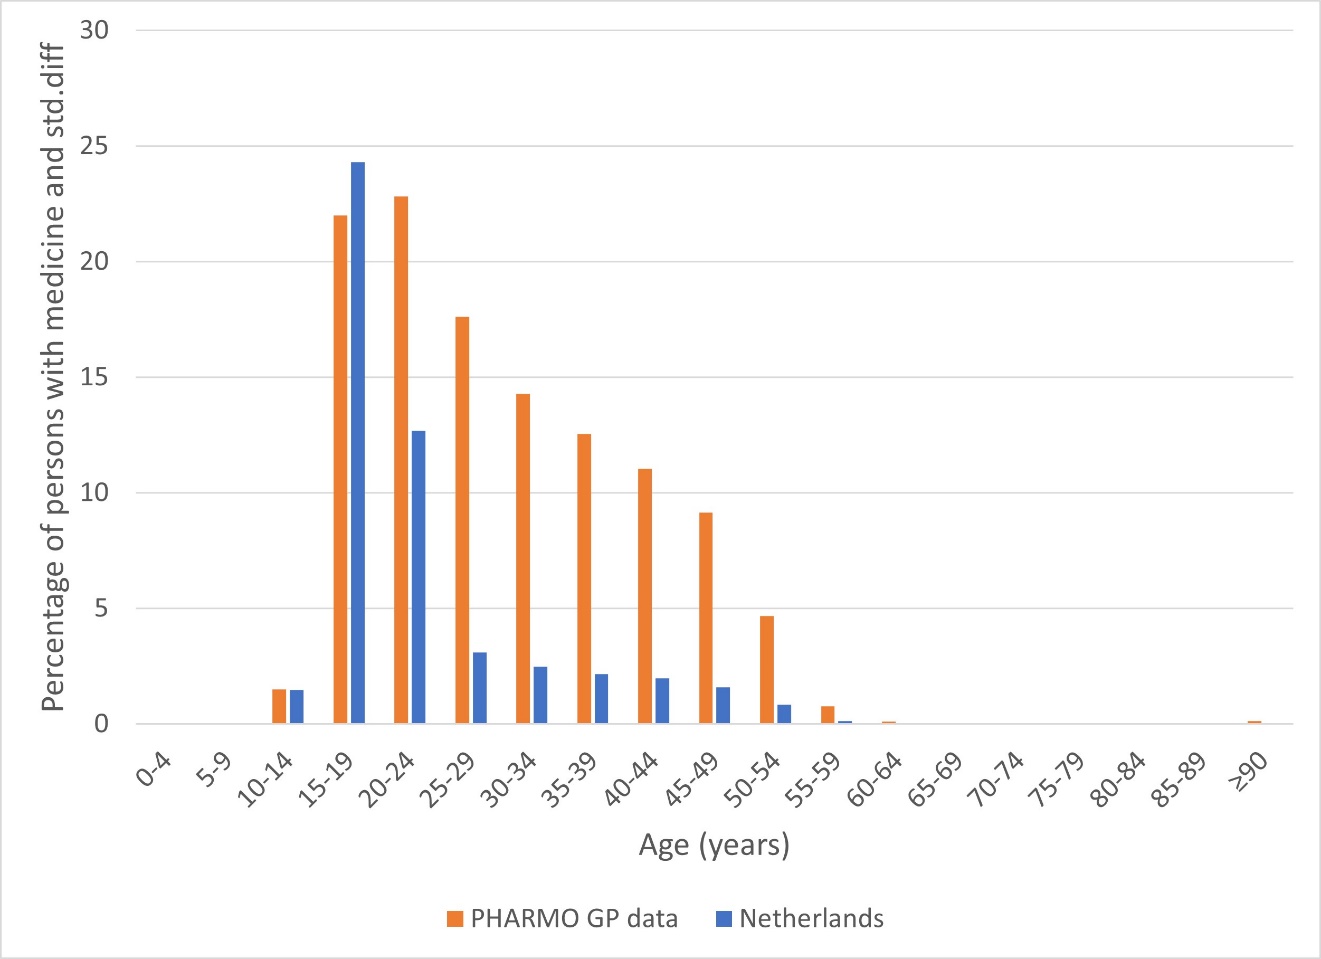


**Figure S8** Hormonal contraceptives for systemic use by age in the PHARMO GP data in 2012
